# Supplementary material
Source: Research Square preprint supplement (doi:10.21203/rs.3.rs-9082655/v1)
Supplement: Supplementary file 2 [file a981c7664f65654e9214f382.pdf]

## Supplementary Materials for

### NK Cell Adoptive Transfer Suppresses Metastasis and Prolongs Survival in Pancreatic Cancer

Ines A. Batista<sup>1,2</sup>, Carolina Dias<sup>1,3,†</sup>, Sofia Almeida<sup>1,3,†</sup>, Joana Cargaleiro<sup>1,4</sup>, Mohamed Emam<sup>5,6</sup>,  
Rui V. Simões<sup>1,7</sup>, Nuno Mendes<sup>1,2</sup>, Sofia T. Quintas<sup>1,2</sup>, Dalila B. Lopes<sup>1,8</sup>, Barbara Morão<sup>9</sup>,  
Marília Cravo<sup>10,11</sup>, Mischa Steketee<sup>12</sup>, Yongsoo Kim<sup>12</sup>, Bauke Ylstra<sup>1,12,13</sup>, Agostinho Antunes<sup>5,6</sup>,  
José C. Machado<sup>1,3,13</sup>, Sonia A. Melo<sup>1,3,7,14\*</sup>

<sup>1</sup>i3S – Institute for Research and Innovation in Health, University of Porto; Porto, Portugal.

<sup>2</sup>ICBAS – School of Medicine and Biomedical Sciences, University of Porto; Porto, Portugal.

<sup>3</sup>Pathology Department of Faculty of Medicine, University of Porto; Porto, Portugal

<sup>4</sup>Department of Biology, University of Aveiro; Aveiro, Portugal.

<sup>5</sup>CIIMAR/CIMAR – Interdisciplinary Centre of Marine and Environmental Research, University of Porto; Porto, Portugal

<sup>6</sup>Department of Biology, Faculty of Sciences, University of Porto; Porto, Portugal

<sup>7</sup>P.CCC – Porto Comprehensive Cancer Center Raquel Seruca; Porto, Portugal

<sup>8</sup>School of Medicine, University of Minho; Braga, Portugal.

<sup>9</sup>Hospital Beatriz Ângelo; Loures, Portugal

<sup>10</sup>Hospital da Luz; Lisbon, Portugal

<sup>11</sup>Faculty of Medicine, University of Lisbon; Lisbon, Portugal

<sup>12</sup>Department of Pathology, Cancer Center Amsterdam, Amsterdam UMC; Amsterdam, The Netherlands

<sup>13</sup>IPATIMUP – Institute of Molecular Pathology and Immunology of the University of Porto; Porto, Portugal.

<sup>14</sup>Unidade Local de Saúde do São João, Centro Hospitalar Universitário São João; Porto, Portugal.

†Contributed equally

\*Corresponding author: smelo@i3s.up.pt

#### **This PDF file includes:**

Figures. S1 to S8

#### **Other Supplementary Materials for this manuscript include the following:**

Source Data File (excel format) containing the raw data of each figure panel  
Scripts used for analysis using R and Python

**Figure. S1.**

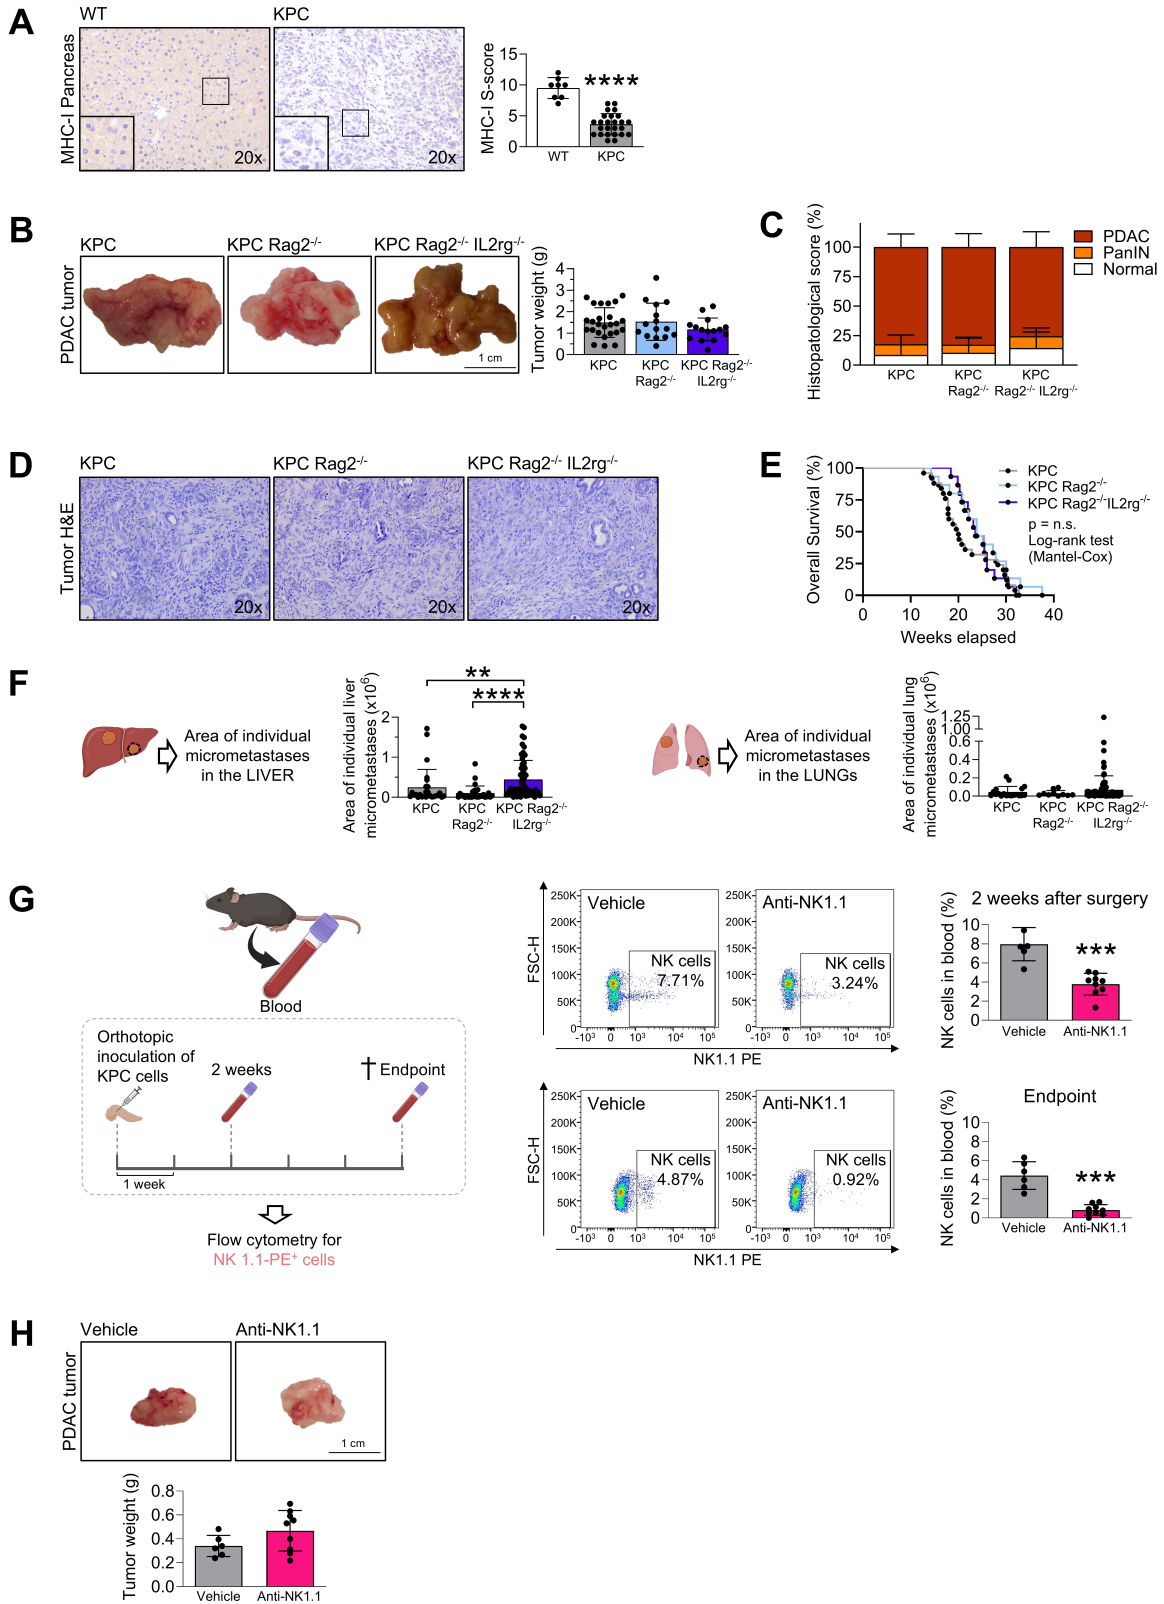

## Supplementary Figure 1

(A) Representative IHC images (20x) of MHC-I in the pancreas of WT and KPC mice and respective S-score given to the staining throughout the whole tissue (Mann-Whitney test, \*\*\*\* $p < 0.0001$ ). (B) Representative photos of tumors from KPC, KPC Rag2<sup>-/-</sup> and KPC Rag2<sup>-/-</sup> IL2rg<sup>-/-</sup> mice (left, scale bar: 1 cm) and respective graphical representation of the tumor weight (right, Mann-Whitney test,  $p$ -values not significant). (C) Histopathological evaluation of the percentage of the pancreas that showed no histological disease/Normal, PanINs and PDAC area in KPC, KPC Rag2<sup>-/-</sup> and KPC Rag2<sup>-/-</sup> IL2rg<sup>-/-</sup> mice (Mann-Whitney test,  $p$ -values not significant). (D) Representative H&E images (20x) of the tumors from KPC, KPC Rag2<sup>-/-</sup> and KPC Rag2<sup>-/-</sup> IL2rg<sup>-/-</sup> mice. (E) Kaplan-Meier curve of the overall survival of KPC (n=25), KPC Rag2<sup>-/-</sup> (n=15) and KPC Rag2<sup>-/-</sup> IL2rg<sup>-/-</sup> (n=15) mice (log-rank Mantel-Cox test,  $p$ -values not significant). (F) Graphical representation of the area of individual micrometastases found in the liver (left) and lung (right) tissue of KPC, KPC Rag2<sup>-/-</sup> and KPC Rag2<sup>-/-</sup> IL2rg<sup>-/-</sup> mice. (Mann-Whitney test, \*\* $p < 0.01$  and \*\*\*\* $p < 0.0001$ ). (G) Representative FACS plots and analysis of the percentage of NK1.1<sup>+</sup> cells (i.e., NK cells) found in the circulation at 2 weeks after orthotopic inoculation of KPC cells (top) and at euthanasia in WT mice treated with vehicle and anti-NK1.1 (Mann-Whitney test, \*\*\* $p < 0.001$ ). (H) Representative photos of tumors from WT mice treated with vehicle and anti-NK1.1 (top, scale bar: 1 cm) and respective graphical representation of the tumor weight (bottom, Mann-Whitney test,  $p$ -value not significant). Schemes created with BioRender.com.

**Figure. S2.**

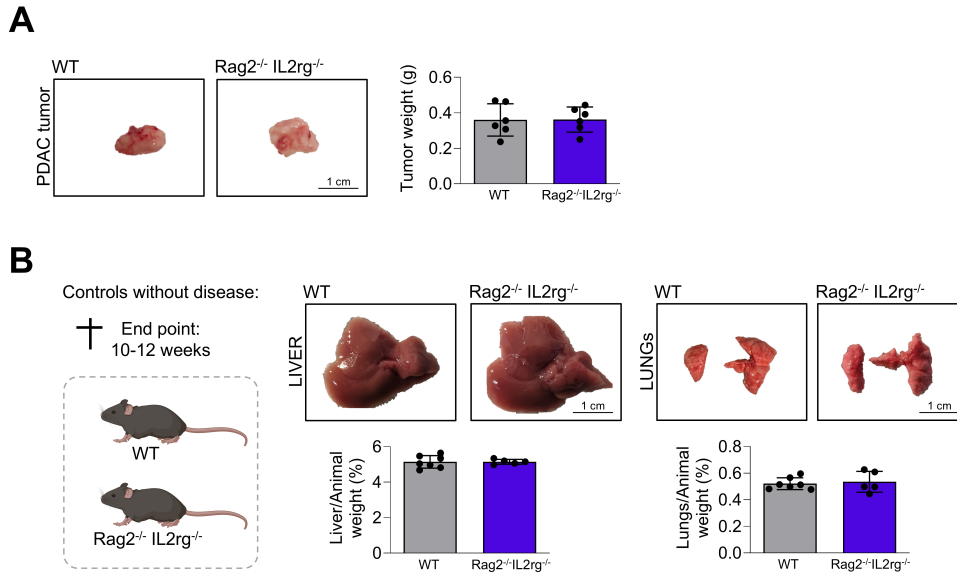

**Supplementary Figure 2**

(A) Representative photos of tumors from WT and Rag2<sup>-/-</sup> IL2rg<sup>-/-</sup> mice that were orthotopically inoculated with KPC cells in the pancreas (left, scale bar: 1 cm) and respective graphical representation of the tumor weight (right, Mann-Whitney test, *p*-value not significant). (B) Schematic representation of the experiment layout (left): in order to control for organ weight and morphology differences due to genotype, control WT (n=7) and Rag2<sup>-/-</sup> IL2rg<sup>-/-</sup> (n=5) mice without disease were euthanized at 10-12 weeks and their organs evaluated. Representative photos of liver and lungs (right) from control WT and Rag2<sup>-/-</sup> IL2rg<sup>-/-</sup> mice without disease (scale bar: 1 cm) and respective graphical representation of the liver/animal weight and lung/animal weight ratios (Mann-Whitney test, *p*-values not significant). Schemes created with BioRender.com.

Figure. S3.

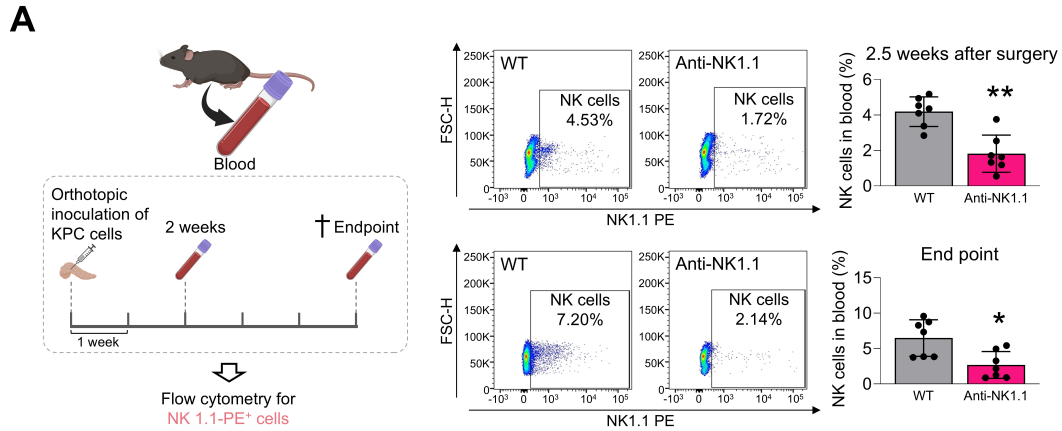

### Supplementary Figure 3

(A) Representative FACS plots and analysis of the percentage of NK1.1<sup>+</sup> cells (i.e., NK cells) found in circulation at 2.5 weeks after orthotopically inoculation of KPC GFP-LUC cells and at euthanasia in WT and anti-NK1.1 mice (Mann-Whitney test, \* $p < 0.05$  and \*\* $p < 0.01$ ). Schemes created with BioRender.com.

**Figure. S4.**

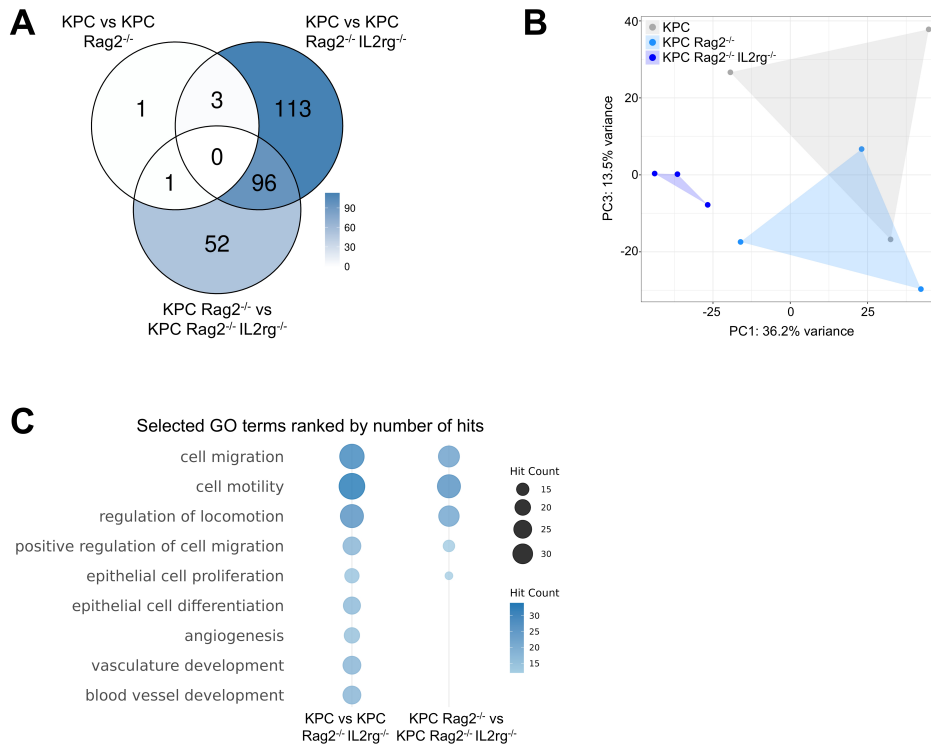

**Supplementary Figure 4**

(A) Venn diagram illustrating the number of DEGs found in the comparison of all the groups: KPC  $Rag2^{-/-}$  IL2rg $^{-/-}$ , KPC  $Rag2^{-/-}$  and KPC. (B) Principal component analysis (PCA) of transcriptomic profiles showing separation between KPC  $Rag2^{-/-}$  IL2rg $^{-/-}$ , KPC  $Rag2^{-/-}$  and KPC, with each point representing an independent sample. Clustering reflects distinct molecular signatures of tumor cells. (C) Selected pathways related to metastasis significantly enriched in KPC  $Rag2^{-/-}$  IL2rg $^{-/-}$  cancer cells in comparison to KPC and KPC  $Rag2^{-/-}$  ranked by number of hits.

**Figure. S5.**

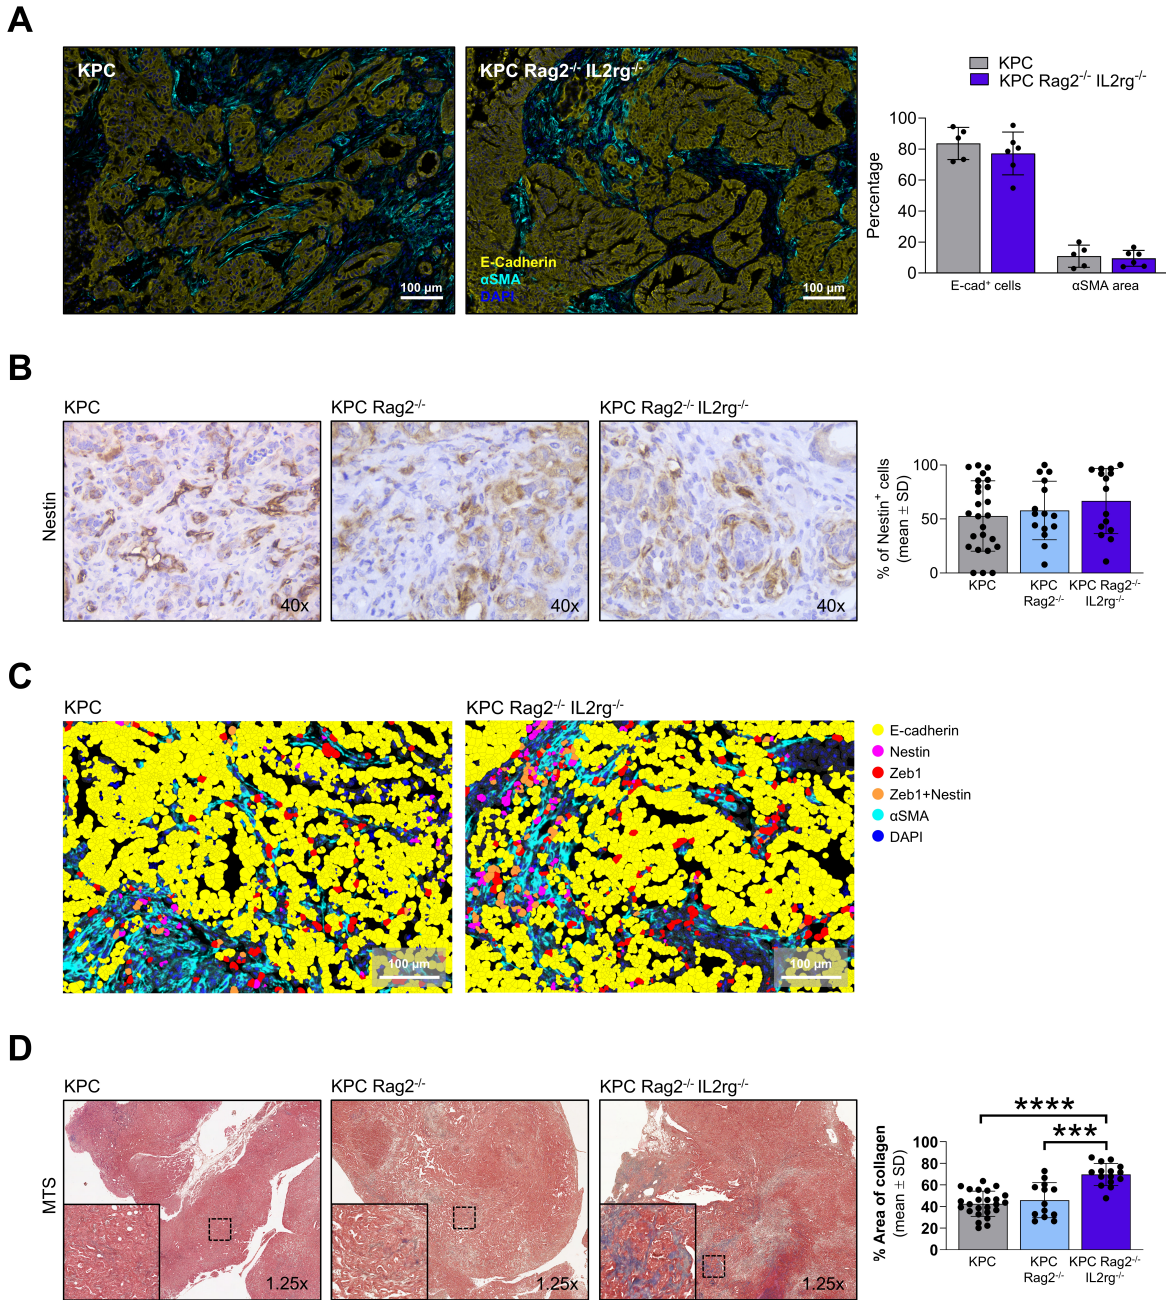

**Supplementary Figure 5**

(A) Representative images (left; Scale bar: 100  $\mu$ m) of multiplex immunofluorescence panel of E-cadherin (cancer cells) and  $\alpha$ SMA (CAFs) in tumors from KPC and KPC Rag2<sup>-/-</sup> IL2rg<sup>-/-</sup> mice and respective quantification (right) of the percentage of cancer cells positive for the epithelial marker E-cadherin and quantification of the area of  $\alpha$ SMA staining in tumors from KPC and KPC

Rag2<sup>-/-</sup> IL2rg<sup>-/-</sup> mice. **(B)** Representative IHC images (40x, left) of Nestin in the primary tumors of KPC (n=25), KPC Rag2<sup>-/-</sup> (n=15) and KPC Rag2<sup>-/-</sup> IL2rg<sup>-/-</sup> (n=15) mice and respective quantification (right) of the percentage of positive cells per field. **(C)** Representation of the spatial distribution of  $\alpha$ SMA<sup>+</sup> CAFs (cyan) in relation to cancer cells (yellow – E-cadherin<sup>+</sup> cancer cells, magenta – Nestin<sup>+</sup> cancer cells, red – Zeb1<sup>+</sup> cancer cells, orange – Zeb1<sup>+</sup> Nestin<sup>+</sup> cancer cells). Scale bar: 100  $\mu$ m. **(D)** Representative images (1.25x, left) of Masson's Trichrome (MTS) staining of primary tumors of KPC, KPC Rag2<sup>-/-</sup> and KPC Rag2<sup>-/-</sup> IL2rg<sup>-/-</sup> mice and respective quantification (right) of the amount of collagen (blue) per field (Mann-Whitney test, \* $p < 0.05$ ).

**Figure. S6.**

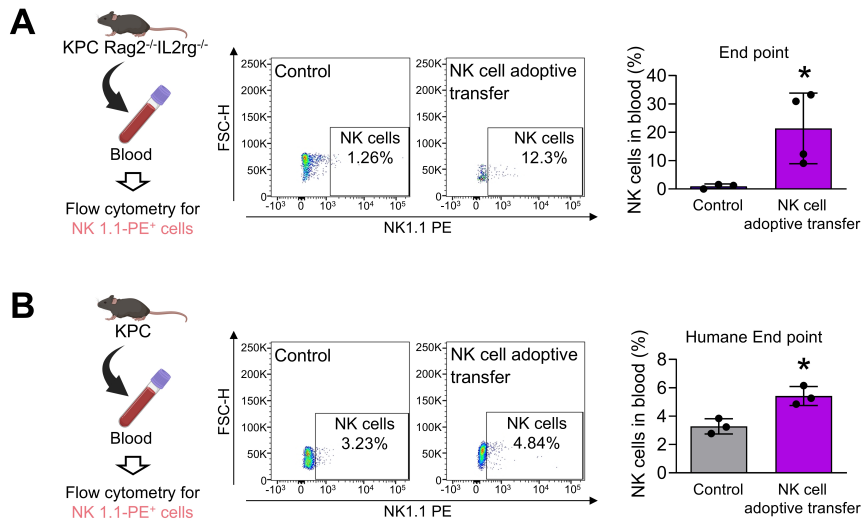

**Supplementary Figure 6**

(A-B) Representative FACS plots and analysis of the percentage of NK1.1<sup>+</sup> cells (i.e., NK cells) found in the circulation of KPC Rag2<sup>-/-</sup> IL2rg<sup>-/-</sup> (A) and KPC (B) mice that received NK cell adoptive transfer versus control (Mann-Whitney test, \* $p < 0.05$  and \*\* $p < 0.01$ ). Schemes created with BioRender.com.

**Figure. S7.**

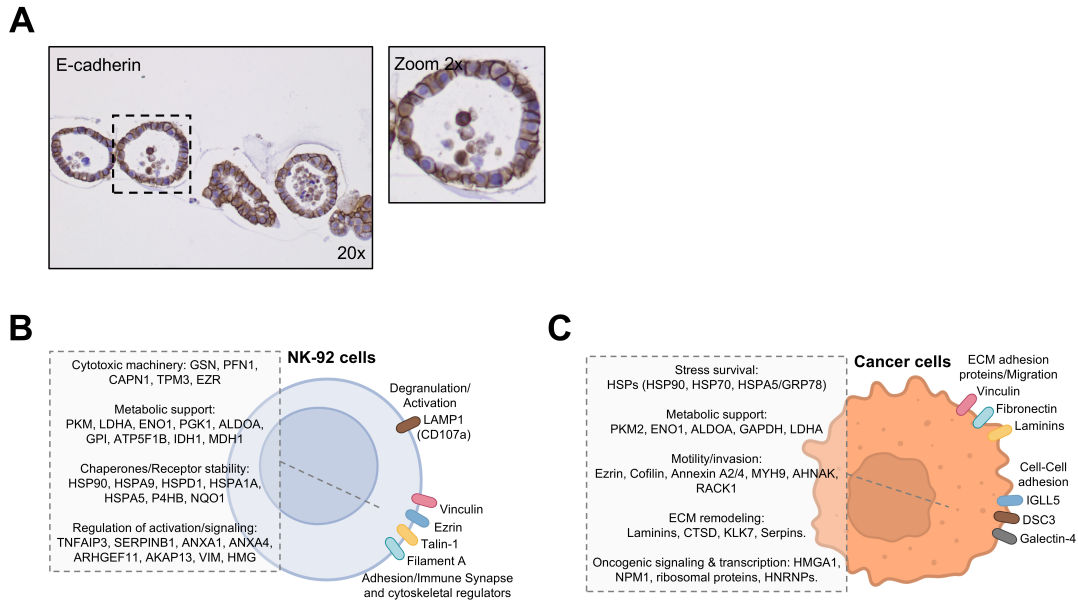

**Supplementary Figure 7**

(A) Representative IHC image (20x, with a 2x zoom) of E-cadherin staining in patient-derived organoids. (B-C) Schematic representation of baseline top 10% expressed membrane and intercellular proteins found through proteomic profiling of NK-92 cells (B) and organoids (C) cultured alone. Schemes created with BioRender.com.

**Figure. S8.**

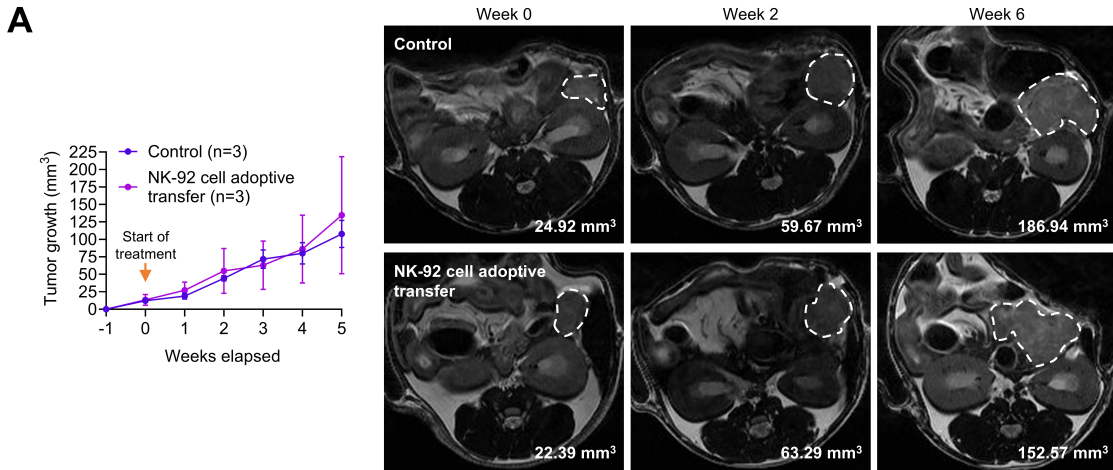

**Supplementary Figure 8**

(A) Evaluation of tumor growth by MRI (fold change of tumor volume in relation to initial tumor volume, Mean  $\pm$  SEM), performed through the duration of the experiment, of mice orthotopically inoculated with PDX cells and treated with vehicle (control) or NK-92 cells upon tumor detection (Two-way ANOVA, *p*-values not significant). Representative MRI images (right; axial orientation) of the tumor of mice treated with vehicle (control) or NK-92 cell adoptive transfer,

with tumor borders outlined in white. **(B)** Table representing the top 25 expressed genes in each NK cell state obtained by cell state discovery using Statescope within TCGA (State 1: n=34; State 2: n=28; State 3: n=75).
